# Supplementary material for: Association of Independent Prognostic Factors and Treatment Modality With Survival and Recurrence Outcomes in Breast Cancer
Source: PubMed Central journal article supplement (PMC7348688; doi:10.1001/jamanetworkopen.2020.7213), 2020-07-09
Supplement: jamanetwopen-3-e207213-s001.pdf [file jamanetwopen-3-e207213-s001.pdf]

## Supplementary Online Content

Nguyen D, Yu J, Reinhold WC, Yang SX. Association of independent prognostic factors and treatment modality with survival and recurrence outcomes in breast cancer. *JAMA Netw Open*. 2020;3(6):e207213.  
doi:10.1001/jamanetworkopen.2020.7213

**eFigure 1.** Nuclear Expression of p53 Protein in Primary Breast Tumors

**eFigure 2.** Effects of p53 Expression on OS and RFS in Patients With Breast Cancer

**eFigure 3.** Evaluation of Risk of Mortality by Dividing Untreated Patients Into Multiple Age Groups

**eTable.** p53 Status in Association With Patient and Clinicopathologic Factors in Breast Cancer

This supplementary material has been provided by the authors to give readers additional information about their work.

**eFigure 1.** Nuclear Expression of p53 Protein in Primary Breast Tumors

Shown are the representative staining of p53-negative tumors (A1 and A2) and p53-positive tumors (B1 and B2). Note that the two p53-positive tumors were derived from patients with high-grade triple-negative breast cancer. Original magnification, x600; scale bar, 50  $\mu$ m.

**eFigure 1**

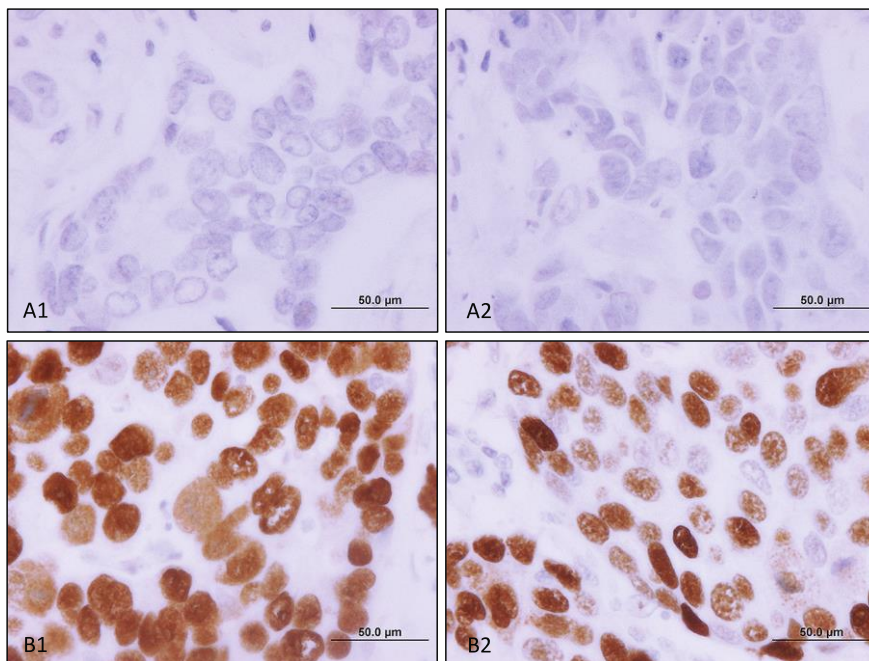

eFigure 2. Effects of p53 Expression on OS and RFS in Patients With Breast Cancer  
 OS and RFS in patients treated with radiotherapy alone (A and B), chemotherapy alone (C and D), and combination therapy (E and F). Numbers and death or recurrence rates in red indicate p53-positive cases. The whiskers on the Kaplan-Meier survival plots represent the censored subjects. OS, overall survival; RFS, recurrence-free survival.

eFigure 2

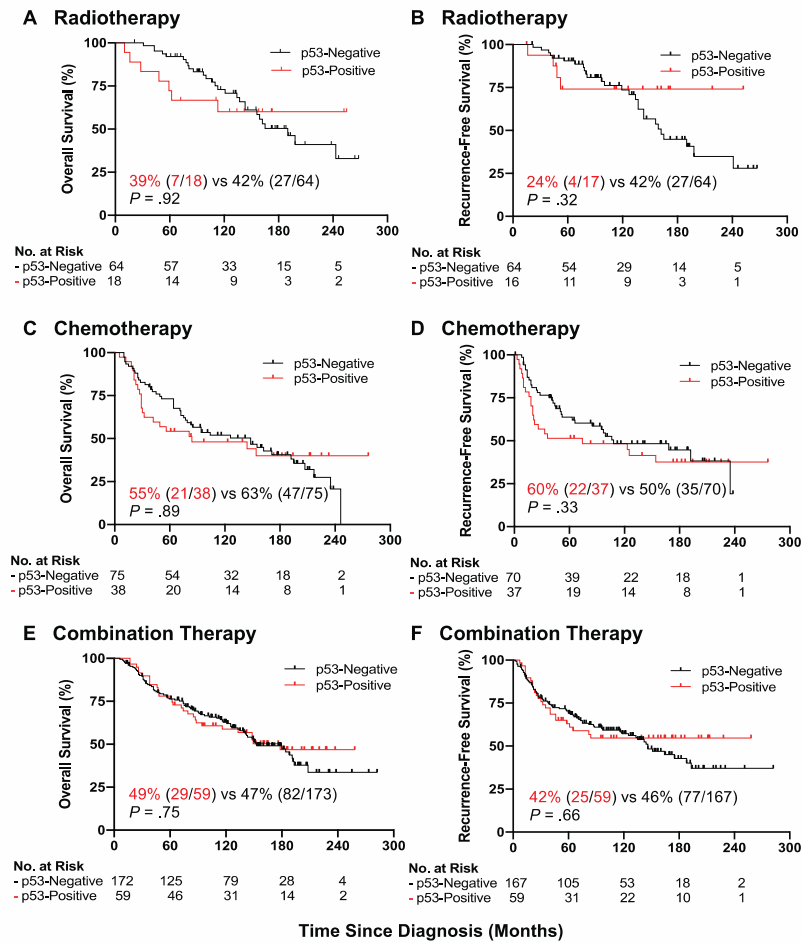

eFigure 3. Evaluation of Risk of Mortality by Dividing Untreated Patients Into Multiple Age Groups

The age groups are shown in the x-axis and the dotted line indicates the hazard ratio of 1.

**eFigure 3**

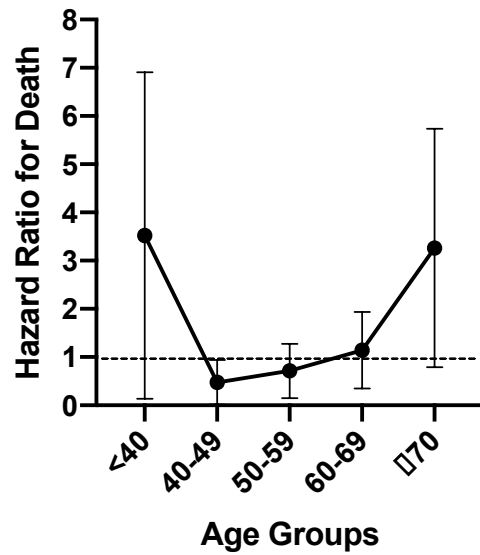

**eTable.** p53 Status in Association With Patient and Clinicopathologic Factors in Breast Cancer

| Variable               | Total (n=785)<br>No. (%) | p53-Negative (n=608)<br>No. (%) | p53-Positive (n=177)<br>No. (%) | P value |
|------------------------|--------------------------|---------------------------------|---------------------------------|---------|
| Age at diagnosis       |                          |                                 |                                 | <.001   |
| < 50                   | 208 (26.5)               | 138 (22.7)                      | 70 (39.5)                       |         |
| ≥ 50                   | 577 (73.5)               | 470 (77.3)                      | 107 (60.5)                      |         |
| Histology              |                          |                                 |                                 | .003    |
| Ductal                 | 727 (92.6)               | 554 (91.1)                      | 173 (97.7)                      |         |
| Lobular                | 58 (7.4)                 | 54 (8.9)                        | 4 (2.3)                         |         |
| T stage                |                          |                                 |                                 | .073    |
| T1                     | 436 (55.5)               | 351 (57.7)                      | 85 (48.0)                       |         |
| T2                     | 216 (27.5)               | 160 (26.3)                      | 56 (31.6)                       |         |
| T3                     | 85 (10.8)                | 59 (9.7)                        | 26 (14.7)                       |         |
| T4                     | 48 (6.1)                 | 38 (6.3)                        | 10 (5.7)                        |         |
| N stage                |                          |                                 |                                 | .095    |
| N0                     | 431 (54.9)               | 343 (56.4)                      | 88 (49.7)                       |         |
| N1                     | 304 (38.7)               | 226 (37.2)                      | 78 (44.1)                       |         |
| N2                     | 49 (6.2)                 | 39 (6.4)                        | 10 (5.6)                        |         |
| N3                     | 1 (0.1)                  | 0 (0.00)                        | 1 (0.6)                         |         |
| Tumor size             |                          |                                 |                                 | .071    |
| ≤ 2 cm                 | 437 (55.7)               | 352 (57.9)                      | 85 (48.0)                       |         |
| > 2 to ≤ 5 cm          | 246 (31.3)               | 183 (30.1)                      | 63 (35.6)                       |         |
| > 5 cm                 | 101 (13.0)               | 73 (12.0)                       | 28 (15.8)                       |         |
| Missing                | 1                        |                                 | 1 (0.6)                         |         |
| Tumor grade            |                          |                                 |                                 | <.001   |
| I                      | 180 (22.9)               | 171 (28.1)                      | 9 (5.1)                         |         |
| II                     | 359 (45.7)               | 303 (49.8)                      | 56 (31.6)                       |         |
| III                    | 246 (31.3)               | 134 (22.0)                      | 112 (63.3)                      |         |
| ER status              |                          |                                 |                                 | <.001   |
| Negative               | 196 (25.0)               | 97 (16.0)                       | 99 (55.9)                       |         |
| Positive               | 547 (69.7)               | 478 (78.6)                      | 69 (39.0)                       |         |
| Missing                | 42 (5.3)                 | 33 (5.4)                        | 9 (5.1)                         |         |
| PR status              |                          |                                 |                                 | <.001   |
| Negative               | 250 (31.9)               | 152 (25.0)                      | 98 (55.4)                       |         |
| Positive               | 494 (62.9)               | 423 (69.6)                      | 71 (40.1)                       |         |
| Missing                | 41 (5.2)                 | 33 (5.4)                        | 8 (4.5)                         |         |
| HER2 status            |                          |                                 |                                 | <.001   |
| Negative               | 628 (80.0)               | 508 (83.6)                      | 120 (67.8)                      |         |
| Positive               | 122 (15.5)               | 72 (11.8)                       | 50 (28.2)                       |         |
| Missing                | 35 (4.5)                 | 28 (4.6)                        | 7 (4.0)                         |         |
| Triple-negative status |                          |                                 |                                 | <.001   |
| No                     | 637 (81.1)               | 524 (86.2)                      | 113 (63.8)                      |         |
| Yes                    | 109 (13.9)               | 52 (8.6)                        | 57 (32.2)                       |         |
| Missing                | 39 (5.0)                 | 32 (5.2)                        | 7 (4.0)                         |         |
| Adjuvant therapy       |                          |                                 |                                 | .001    |
| None                   | 227 (28.9)               | 183 (30.1)                      | 44 (24.9)                       |         |
| Endocrine therapy      | 130 (16.6)               | 113 (18.6)                      | 17 (9.6)                        |         |
| Radiotherapy           | 82 (10.5)                | 64 (10.5)                       | 18 (10.2)                       |         |
| Chemotherapy           | 113 (14.4)               | 76 (12.5)                       | 38 (21.5)                       |         |
| Other therapy          | 1 (0.10)                 | 0 (0.00)                        | 1 (0.5)                         |         |
| Combination            | 232 (29.5)               | 172 (28.3)                      | 59 (33.3)                       |         |

Abbreviations: ER, estrogen receptor; HER2, human epidermal growth receptor 2; n, number; PR, progesterone receptor.
